# Supplementary material for: Global coordination of metabolic pathways in Escherichia coli by active and passive regulation
Source: PubMed Central journal article supplement (PMC8045939; doi:10.15252/msb.202010064), 2021-04-14
Supplement: MSB-17-e10064-s006.pdf [file MSB-17-e10064-s006.pdf]

# Global coordination of metabolic pathways in *Escherichia coli* by active and passive regulation

Karl Kochanowski, Hiroyuki Okano, Vadim Patsalo, James R. Williamson, Uwe Sauer, and Terence Hwa

DOI: [10.15252/msb.202010064](https://doi.org/10.15252/msb.202010064)

Corresponding author(s): Terence Hwa ([hwa@ucsd.edu](mailto:hwa@ucsd.edu))

---

## Review Timeline:

|                     |             |
|---------------------|-------------|
| Submission Date:    | 15th Oct 20 |
| Editorial Decision: | 16th Nov 20 |
| Revision Received:  | 3rd Feb 21  |
| Editorial Decision: | 10th Feb 21 |
| Revision Received:  | 4th Mar 21  |
| Accepted:           | 9th Mar 21  |

---

Editor: Maria Polychronidou

## Transaction Report:

(Note: With the exception of the correction of typographical or spelling errors that could be a source of ambiguity, letters and reports are not edited. Depending on transfer agreements, referee reports obtained elsewhere may or may not be included in this compilation. Referee reports are anonymous unless the Referee chooses to sign their reports.)

Thank you again for submitting your work to Molecular Systems Biology. We have now heard back from the two referees who agreed to evaluate your study. Overall, the reviewers are supportive. However, they raise a series of concerns, which we would ask you to address in a revision.

I think that the recommendations of the referees are rather clear and straightforward to address. Therefore, I see no need to repeat any of the points listed below. Please let me know in case you would like to discuss any of the issues raised. All issues raised by the referees would need to be satisfactorily addressed.

On a more editorial level, we would ask you to address the following points.

## REFEREE REPORTS

-----

### Reviewer #1:

The authors study the coordinated regulation of bacterial metabolic fluxes in response to nutrient limitation, using *E. coli* as a well suited model system. The phenomenology of the coordinated metabolic response to carbon and nitrogen limitation has largely been established, but the underlying mechanisms have been elusive. Aiming to fill in this important gap, the authors combined state-of-the-art mass spectrometry of metabolites and proteins with fluorescent reporter assays and metabolic flux analysis. To obtain full external control of both carbon and nitrogen limitation, the authors constructed strains that permit them to externally titrate carbon uptake and amino acid synthesis. These strains appear to recapitulate the known behavior of the wild-type system under carbon and nitrogen limitation. Overall, the research is professionally executed by leading experts in the field. The central conclusion is that the coordinated response in the metabolic fluxes is largely the combined result of global transcription regulation by Crp and "local adjustment" of the fluxes via passive changes in metabolite concentrations. These two contributions are found to rationalize about 50% of the observed metabolic flux changes. The authors adequately discuss both the

importance and the limitations of their findings. Therefore, there is no doubt in my mind that this manuscript deserves to be published in MSB. I do have a couple of questions and comments to the authors though:

(1) Regarding the massive secretion of 2-oxoglutarate under the genetically induced nitrogen limitation: It was not clear to me whether this was potentially an artefact of the titration of GOGAT to emulate anabolic limitation. The authors mentioned that this lead to a reduction in biomass yield consistent with that observed in nitrogen-limited chemostat cultures. This statement appears to imply that 2-oxoglutarate secretion is not an artefact and will equally occur in the wild-type system, but simply has gone unnoticed so far. Is this implication intended? If yes, what are the further implications of this observation? For instance, in the case of acetate secretion, cells later switch to take up and utilize acetate again (after glucose is depleted) - is 2-oxoglutarate also reused later?

(2) To me, the flux-balance analysis applied to obtain the metabolic fluxes is largely a black box, which leaves me wondering what the level of confidence in the resulting fluxes should be. Could the authors convey some sense of the level of uncertainty in these fluxes, especially for the reader who has no first-hand experience with flux-balance analysis? For instance, in the end roughly 50% of the measured flux changes are not fully explained by the changes in protein levels and metabolite concentrations. How should one think about those 50%? If one takes all the metabolic fluxes inferred from flux-balance analysis very seriously, then there is major additional regulation going on, which future work will have to clarify. Or are the observations well within the margin of error, such that it is not clear that significant additional regulation must be happening?

(3) Given the (plausible) finding that Crp indirectly represses all non-Crp targets by diverting expression capacity to the Crp targets, it is actually interesting (from a mechanistic perspective) that a significant number of genes do not appear to change their expression much with growth rate under either carbon or nitrogen limitation (Hui et al, Mol Syst Biol, 2015). Does this mean that all of these genes must have an additional layer of regulation which enables them to maintain their expression level essentially constant? Is there perhaps a similarly generic and simple mechanism to achieve this?

(4) Regarding the regulation via changes of metabolite concentrations and level of saturation of the enzymes: I am still in a somewhat confused state of mind, even after reading the discussion section and the supplementary information sections 3 and 4. How can passive changes of the metabolite levels always automatically produce the intended changes in the fluxes? I understand that there is a nonlinear feedback effect and that this is passive, i.e. it does not require any additional regulation mechanism. But how come this passive feedback always goes in the right direction? (and amplitude?) Also, this requires that none of these metabolic enzymes is fully saturated in vivo. The definition of  $\rho_S$  in eq. S7, which relies on eq. S2, actually assumes non-saturated enzymes to begin with. Is this assumption consistent? In other words, does this assumption hold for those enzymes where the authors find a significant regulatory contribution from changes in metabolite level?

Reviewer #2:

The manuscript by Kochanowski and colleagues describes a comprehensive study on the proteomic and metabolomic responses to catabolic and anabolic limitations in *E. coli*. By titrating the level of cyclic AMP, they found that the catabolic repressor (CRP) not only directly regulate

catabolic enzymes as it was known for, but it also indirectly affects the expression of anabolic enzymes, presumably by shifting global resources for transcription or translation. The latter indirect effect presents an interesting 'mechanism' for reprogramming gene expression without direct regulatory connections, which is reminiscent of the effects of (p)ppGpp on constitutive promoters that the authors have previously demonstrated.

The authors further showed that the proteomic changes under nutrient limitation is insufficient to explain the changes in metabolic fluxes. For many enzymes, there are excess capacities at reduced growth rates, and the changes in substrate concentration are correlated to the flux changes. These results suggest that most enzymes are not operating near saturation, and that cells overproduce these proteins under nutrient limitation. This suboptimal proteome allocation may be a side effect of having only a coarse regulator (CRP) that controls both anabolic and catabolic enzyme production.

Understanding how cells allocate their proteome is one of the core questions in systems biology. The first half of this work provides a basis for how global reprogramming can be achieved by a single regulator through its direct and indirect effects. The second half of this work describes a simple principle of 'rules of thumb' for coping with environmental changes. Both observations are highly informative and will influence future studies on this subject. I support publication at Molecular Systems Biology with minor revision. Below are several minor suggestions.

1. This study achieves nutrient limitation by artificially titrating the expression of glucose transporter or glutamate synthase. While elegant, this approach raises a question of whether the proteomic response, and especially the overproduction of enzymes, is related to the inability to launch coordinated expression of catabolic or anabolic enzymes in these strains. In other words, is it possible that if the native regulation were intact, the growth would not be limited by a single bottleneck, but by a multitude of enzymes that are regulated together? It may be difficult to answer this question experimentally. Perhaps the authors could look into existing proteomic data on wildtype strains and see if there are situations in which the relative expression between the titrated enzyme and the non-saturated enzymes is as low as what was seen in this work.

2. The strain NQ1399 has noticeable upregulation in flagella and chemotaxis genes (Fig. S7B). Although it is unlikely to change the conclusions drawn from this strain, if the authors want to figure out the source of this upregulation, they may check if there are additional genetic differences in the promoter of *flhDC* or in *IrhA*, which are frequently mutated during strain construction (<https://doi.org/10.1128/JB.00259-19>).

**Response to specific reviewer comments:****Reviewer #1:**

The authors study the coordinated regulation of bacterial metabolic fluxes in response to nutrient limitation, using *E. coli* as a well suited model system. The phenomenology of the coordinated metabolic response to carbon and nitrogen limitation has largely been established, but the underlying mechanisms have been elusive. Aiming to fill in this important gap, the authors combined state-of-the-art mass spectrometry of metabolites and proteins with fluorescent reporter assays and metabolic flux analysis. To obtain full external control of both carbon and nitrogen limitation, the authors constructed strains that permit them to externally titrate carbon uptake and amino acid synthesis. These strains appear to recapitulate the known behavior of the wild-type system under carbon and nitrogen limitation. Overall, the research is professionally executed by leading experts in the field. The central conclusion is that the coordinated response in the metabolic fluxes is largely the combined result of global transcription regulation by Crp and "local adjustment" of the fluxes via passive changes in metabolite concentrations. These two contributions are found to rationalize about 50% of the observed metabolic flux changes. The authors adequately discuss both the importance and the limitations of their findings. Therefore, there is no doubt in my mind that this manuscript deserves to be published in MSB. I do have a couple of questions and comments to the authors though:

**Author response:**

We thank this reviewer for their positive assessment of our work.

(1) Regarding the massive secretion of 2-oxoglutarate under the genetically induced nitrogen limitation: It was not clear to me whether this was potentially an artefact of the titration of GOGAT to emulate anabolic limitation. The authors mentioned that this lead to a reduction in biomass yield consistent with that observed in nitrogen-limited chemostat cultures. This statement appears to imply that 2-oxoglutarate secretion is not an artefact and will equally occur in the wild-type system, but simply has gone unnoticed so far. Is this implication intended? If yes, what are the further implications of this observation? For instance, in the case of acetate secretion, cells later switch to take up and utilize acetate again (after glucose is depleted) - is 2-oxoglutarate also reused later?

**Author response:**

This reviewer raises an interesting point. Given the consistent drop in biomass yield and 2-oxoglutarate accumulation between our GOGAT titration and N-limited chemostats, it is certainly conceivable that 2-oxoglutarate may also be secreted by N-limited chemostats. Although to our knowledge 2-oxoglutarate secretion has never been reported in N-limited chemostats, recent studies have already demonstrated that many metabolites other than acetate can be secreted by *E. coli* (e.g. PMID 22963408, PMID 23903661), notably including 2-oxoglutarate (PMID 22963408). Similarly, it is conceivable that *E. coli* may utilize secreted 2-oxoglutarate (according to literature, *E. coli* can grow on 2-oxoglutarate as the sole carbon source). However, we believe that testing these conjectures experimentally is beyond the scope of this manuscript.

In the revised manuscript, we now discuss the 2-oxoglutarate secretion data in more detail (lines 188-191).

(2) To me, the flux-balance analysis applied to obtain the metabolic fluxes is largely a black box, which leaves me wondering what the level of confidence in the resulting fluxes should be. Could the authors convey some sense of the level of uncertainty in these fluxes, especially for the reader who

has no first-hand experience with flux-balance analysis? For instance, in the end roughly 50% of the measured flux changes are not fully explained by the changes in protein levels and metabolite concentrations. How should one think about those 50%? If one takes all the metabolic fluxes inferred from flux-balance analysis very seriously, then there is major additional regulation going on, which future work will have to clarify. Or are the observations well within the margin of error, such that it is not clear that significant additional regulation must be happening?

Author response:

This reviewer raises an interesting question. In order to assess the uncertainty of our flux estimates, we adapted our flux balance analysis pipeline such that it also enables flux variability analysis (FVA). FVA allows to determine for each flux the range of values that are compatible with the constraints set by the physiology data, and thus provides a measure of the flux uncertainty. Our FVA analysis revealed that for the vast majority of FBA estimates, the flux uncertainty is indeed minimal, consistent with previous work in yeast (PMID 27789812).

In the revised manuscript, we now include the FVA results in Appendix Figure S13D. Moreover, we greatly expanded our description of the FBA and FVA methods to clarify this aspect of our work. In addition, we included the source code necessary to reproduce the FBA and FVA results in the revision documents, and will make it publicly available in GitHub prior to publication.

(3) Given the (plausible) finding that Crp indirectly represses all non-Crp targets by diverting expression capacity to the Crp targets, it is actually interesting (from a mechanistic perspective) that a significant number of genes do not appear to change their expression much with growth rate under either carbon or nitrogen limitation (Hui et al, Mol Syst Biol, 2015). Does this mean that all of these genes must have an additional layer of regulation which enables them to maintain their expression level essentially constant? Is there perhaps a similarly generic and simple mechanism to achieve this?

Author response:

This reviewer is right, our results do suggest that proteome sectors which deviate from the expression patterns of anabolic proteins (and are not Crp-regulated) have additional regulatory layers. In the manuscript, we discuss one such proteome sector (ribosomal proteins), which strictly correlate with the growth rate in both catabolic and anabolic limitations, and for which we already propose a putative mechanism (i.e. regulation by ppGpp). For other expression patterns, in particular the “constitutive”-like pattern this reviewer is referring to, we currently do not know the underlying mechanism.

In the revised manuscript, we expanded our discussion of this point (lines 302-305).

(4) Regarding the regulation via changes of metabolite concentrations and level of saturation of the enzymes: I am still in a somewhat confused state of mind, even after reading the discussion section and the supplementary information sections 3 and 4. How can passive changes of the metabolite levels always automatically produce the intended changes in the fluxes? I understand that there is a nonlinear feedback effect and that this is passive, i.e. it does not require any additional regulation mechanism. But how come this passive feedback always goes in the right direction? (and amplitude?) Also, this requires that none of these metabolic enzymes is fully saturated in vivo. The definition of  $\rho_S$  in eq. S7, which relies on eq. S2, actually assumes non-saturated enzymes to begin with. Is this assumption consistent? In other words, does this assumption hold for those enzymes where the authors find a significant regulatory contribution from changes in metabolite level?

Author response:

We apologize for the lack of clarity in the original submission. The regulation analysis employed in this work is best understood as a systematic “consistency check” of flux/protein/metabolite changes

for individual reactions. This consistency check involves fits to simplified forms of the actual enzyme kinetics (in which a single parameter,  $\alpha$ , encapsulates the impact of each substrate on a given reaction). These fits enable us to test whether – given the uncertainty of the actual in vivo enzyme kinetics – the discrepancy between flux and protein changes can be accounted for by the observed changes in substrate concentration. Using full mechanistic enzyme kinetic models would require knowledge of the in vivo kinetic parameters, which are mostly inaccessible.

This reviewer is right, such a “passive regulation” mechanism requires non-saturated enzymes: in this case, substrates effectively act as buffers, where at a given flux  $v$  a decrease in  $E$  will automatically lead to an increase in substrate concentration to maintain balanced flux. Our data alone does not allow to determine whether any given enzyme is non-saturated (since we only have relative metabolite concentrations available). Nevertheless, recent studies suggest that many metabolic enzymes in *E. coli* are non-saturated in vivo (e.g. PMID 27351952).

In the revised manuscript, we expanded the description of the approach in the appendix (section 3). In addition, we included the source code necessary to reproduce the regulation analysis results in the revision documents, and will make it publicly available in GitHub prior to publication.

#### **Reviewer #2:**

The manuscript by Kochanowski and colleagues describes a comprehensive study on the proteomic and metabolomic responses to catabolic and anabolic limitations in *E. coli*. By titrating the level of cyclic AMP, they found that the catabolic repressor (CRP) not only directly regulate catabolic enzymes as it was known for, but it also indirectly affects the expression of anabolic enzymes, presumably by shifting global resources for transcription or translation. The latter indirect effect presents an interesting ‘mechanism’ for reprogramming gene expression without direct regulatory connections, which is reminiscent of the effects of (p)ppGpp on constitutive promoters that the authors have previously demonstrated.

The authors further showed that the proteomic changes under nutrient limitation is insufficient to explain the changes in metabolic fluxes. For many enzymes, there are excess capacities at reduced growth rates, and the changes in substrate concentration are correlated to the flux changes. These results suggest that most enzymes are not operating near saturation, and that cells overproduce these proteins under nutrient limitation. This suboptimal proteome allocation may be a side effect of having only a coarse regulator (CRP) that controls both anabolic and catabolic enzyme production.

Understanding how cells allocate their proteome is one of the core questions in systems biology. The first half of this work provides a basis for how global reprogramming can be achieved by a single regulator through its direct and indirect effects. The second half of this work describes a simple principle of ‘rules of thumb’ for coping with environmental changes. Both observations are highly informative and will influence future studies on this subject. I support publication at Molecular Systems Biology with minor revision. Below are several minor suggestions.

#### **Author response:**

We thank this reviewer for their positive assessment of our work.

1. This study achieves nutrient limitation by artificially titrating the expression of glucose transporter or glutamate synthase. While elegant, this approach raises a question of whether the proteomic response, and especially the overproduction of enzymes, is related to the inability to launch coordinated expression of catabolic or anabolic enzymes in these strains. In other words, is it possible that if the native regulation were intact, the growth would not be limited by a single

bottleneck, but by a multitude of enzymes that are regulated together? It may be difficult to answer this question experimentally. Perhaps the authors could look into existing proteomic data on wildtype strains and see if there are situations in which the relative expression between the titrated enzyme and the non-saturated enzymes is as low as what was seen in this work.

Author response:

We agree with this reviewer that our usage of titration strains – albeit highly useful to generate gradual catabolic/anabolic limitations – does come with caveats. Recent proteomics efforts using wildtype *E. coli* strains (PMID 26641532) show at least for various carbon sources (= catabolic limitation) a similar inverse expression pattern for AA metabolism and e.g. respiratory proteins (which are part of C-sector). Unfortunately, this study did not include any anabolic limitations (i.e. nitrogen-limited chemostats), and we are also not aware of any other large-scale proteomics data set in *E. coli* which includes anabolic limitations. Therefore, the question of whether the inverse coordinated expression of catabolic and anabolic proteins extends to more natural anabolic limitations remains open.

In the revised manuscript, we expanded the discussion of our study's caveats to reflect this reviewer's concern (lines 348-353).

2. The strain NQ1399 has noticeable upregulation in flagella and chemotaxis genes (Fig. S7B). Although it is unlikely to change the conclusions drawn from this strain, if the authors want to figure out the source of this upregulation, they may check if there is additional genetic differences in the promoter of *flhDC* or in *IrhA*, which are frequently mutated during strain construction (<https://doi.org/10.1128/JB.00259-19>).

Author response:

This reviewer raises an interesting point. We did not sequence the strains, therefore it is certainly possible that some expression changes we observe are caused by acquired mutations. In this particular case, we note that we observed a **down**regulation in flagella/chemotaxis genes, which nevertheless may be caused by mutations in *flhDC* or in *IrhA*.

In the revised manuscript, we now include this point as well as reference suggested by this reviewer (lines 136-138).



**1st Revision - Editorial Decision****10th Feb 2021**

---

Thank you again for sending us your revised manuscript. We think that the performed revisions satisfactorily address the reviewers' concerns and we are glad to inform you that we can soon accept the study for publication.

Before we can formally accept the manuscript we would ask you to address a few remaining editorial issues listed below.

**2nd Authors' Response to Reviewers****4th Mar 2021**

---

The authors have made all requested editorial changes.

**2nd Revision - Editorial Decision****9th Mar 2021**

---

Thank you again for sending us your revised manuscript. We are now satisfied with the modifications made and I am pleased to inform you that your paper has been accepted for publication.

**YOU MUST COMPLETE ALL CELLS WITH A PINK BACKGROUND** ↓

PLEASE NOTE THAT THIS CHECKLIST WILL BE PUBLISHED ALONGSIDE YOUR PAPER

Corresponding Author Name: Karl Kochanowski, Terence Hwa

Journal Submitted to: Molecular Systems Biology

Manuscript Number: MSB-2020-10064

### Reporting Checklist For Life Sciences Articles (Rev. June 2017)

This checklist is used to ensure good reporting standards and to improve the reproducibility of published results. These guidelines are consistent with the Principles and Guidelines for Reporting Preclinical Research issued by the NIH in 2014. Please follow the journal's authorship guidelines in preparing your manuscript.

#### A- Figures

##### 1. Data

##### The data shown in figures should satisfy the following conditions:

- the data were obtained and processed according to the field's best practice and are presented to reflect the results of the experiments in an accurate and unbiased manner.
- figure panels include only data points, measurements or observations that can be compared to each other in a scientifically meaningful way.
- graphs include clearly labeled error bars for independent experiments and sample sizes. Unless justified, error bars should not be shown for technical replicates.
- if  $n < 5$ , the individual data points from each experiment should be plotted and any statistical test employed should be justified.
- Source Data should be included to report the data underlying graphs. Please follow the guidelines set out in the author ship guidelines on Data Presentation.

##### 2. Captions

##### Each figure caption should contain the following information, for each panel where they are relevant:

- a specification of the experimental system investigated (eg cell line, species name).
- the assay(s) and method(s) used to carry out the reported observations and measurements
- an explicit mention of the biological and chemical entity(ies) that are being measured.
- an explicit mention of the biological and chemical entity(ies) that are altered/varied/perturbed in a controlled manner.
- the exact sample size (n) for each experimental group/condition, given as a number, not a range;
- a description of the sample collection allowing the reader to understand whether the samples represent technical or biological replicates (including how many animals, litters, cultures, etc.).
- a statement of how many times the experiment shown was independently replicated in the laboratory.
- definitions of statistical methods and measures:
  - common tests, such as t-test (please specify whether paired vs. unpaired), simple  $\chi^2$  tests, Wilcoxon and Mann-Whitney tests, can be unambiguously identified by name only, but more complex techniques should be described in the methods section;
  - are tests one-sided or two-sided?
  - are there adjustments for multiple comparisons?
  - exact statistical test results, e.g., P values = x but not P values < x;
  - definition of 'center values' as median or average;
  - definition of error bars as s.d. or s.e.m.

Any descriptions too long for the figure legend should be included in the methods section and/or with the source data.

**In the pink boxes below, please ensure that the answers to the following questions are reported in the manuscript itself. Every question should be answered. If the question is not relevant to your research, please write NA (non applicable). We encourage you to include a specific subsection in the methods section for statistics, reagents, animal models and human subjects.**

#### B- Statistics and general methods

Please fill out these boxes ↓ (Do not worry if you cannot see all your text once you press return)

|                                                                                                                                                                                         |                                                                                   |
|-----------------------------------------------------------------------------------------------------------------------------------------------------------------------------------------|-----------------------------------------------------------------------------------|
| 1.a. How was the sample size chosen to ensure adequate power to detect a pre-specified effect size?                                                                                     | Sample sizes were determined empirically based on previous studies                |
| 1.b. For animal studies, include a statement about sample size estimate even if no statistical methods were used.                                                                       | NA                                                                                |
| 2. Describe inclusion/exclusion criteria if samples or animals were excluded from the analysis. Were the criteria pre-established?                                                      | No samples were excluded from the analysis                                        |
| 3. Were any steps taken to minimize the effects of subjective bias when allocating animals/samples to treatment (e.g. randomization procedure)? If yes, please describe.                | NA                                                                                |
| For animal studies, include a statement about randomization even if no randomization was used.                                                                                          | NA                                                                                |
| 4.a. Were any steps taken to minimize the effects of subjective bias during group allocation or/and when assessing results (e.g. blinding of the investigator)? If yes please describe. | No                                                                                |
| 4.b. For animal studies, include a statement about blinding even if no blinding was done                                                                                                | NA                                                                                |
| 5. For every figure, are statistical tests justified as appropriate?                                                                                                                    | Yes                                                                               |
| Do the data meet the assumptions of the tests (e.g., normal distribution)? Describe any methods used to assess it.                                                                      | NA                                                                                |
| Is there an estimate of variation within each group of data?                                                                                                                            | Yes, given as standard deviation or standard error (as labeled in figure legends) |

#### USEFUL LINKS FOR COMPLETING THIS FORM

<http://www.antibodypedia.com>  
<http://1degreebio.org>  
<http://www.equator-network.org/reporting-guidelines/improving-bioscience-research-repor>  
  
<http://grants.nih.gov/grants/olaw/olaw.htm>  
<http://www.mrc.ac.uk/Ourresearch/Ethicsresearchguidance/Useofanimals/index.htm>  
<http://ClinicalTrials.gov>  
<http://www.consort-statement.org>  
<http://www.consort-statement.org/checklists/view/32-consort/66-title>  
  
<http://www.equator-network.org/reporting-guidelines/reporting-recommendations-for-tum>  
  
<http://datadryad.org>  
  
<http://figshare.com>  
  
<http://www.ncbi.nlm.nih.gov/gap>  
  
<http://www.ebi.ac.uk/ega>  
  
<http://biomodels.net/>  
  
<http://biomodels.net/miriam/>  
<http://jij.biochem.sun.ac.za>  
[http://oba.od.nih.gov/biosecurity/biosecurity\\_documents.html](http://oba.od.nih.gov/biosecurity/biosecurity_documents.html)  
<http://www.selectagents.gov/>

|                                                                                   |     |
|-----------------------------------------------------------------------------------|-----|
| Is the variance similar between the groups that are being statistically compared? | Yes |
|-----------------------------------------------------------------------------------|-----|

### C- Reagents

|                                                                                                                                                                                                                                                                                                                                                                  |    |
|------------------------------------------------------------------------------------------------------------------------------------------------------------------------------------------------------------------------------------------------------------------------------------------------------------------------------------------------------------------|----|
| 6. To show that antibodies were profiled for use in the system under study (assay and species), provide a citation, catalog number and/or clone number, supplementary information or reference to an antibody validation profile. e.g., Antibodypedia ( <a href="#">see link list at top right</a> ), 1DegreeBio ( <a href="#">see link list at top right</a> ). | NA |
| 7. Identify the source of cell lines and report if they were recently authenticated (e.g., by STR profiling) and tested for mycoplasma contamination.                                                                                                                                                                                                            | NA |

\* for all hyperlinks, please see the table at the top right of the document

### D- Animal Models

|                                                                                                                                                                                                                                                                                                                                                                                                                                          |    |
|------------------------------------------------------------------------------------------------------------------------------------------------------------------------------------------------------------------------------------------------------------------------------------------------------------------------------------------------------------------------------------------------------------------------------------------|----|
| 8. Report species, strain, gender, age of animals and genetic modification status where applicable. Please detail housing and husbandry conditions and the source of animals.                                                                                                                                                                                                                                                            | NA |
| 9. For experiments involving live vertebrates, include a statement of compliance with ethical regulations and identify the committee(s) approving the experiments.                                                                                                                                                                                                                                                                       | NA |
| 10. We recommend consulting the ARRIVE guidelines ( <a href="#">see link list at top right</a> ) (PLoS Biol. 8(6), e1000412, 2010) to ensure that other relevant aspects of animal studies are adequately reported. See author guidelines, under 'Reporting Guidelines'. See also: NIH ( <a href="#">see link list at top right</a> ) and MRC ( <a href="#">see link list at top right</a> ) recommendations. Please confirm compliance. | NA |

### E- Human Subjects

|                                                                                                                                                                                                                                                                                                                                                        |    |
|--------------------------------------------------------------------------------------------------------------------------------------------------------------------------------------------------------------------------------------------------------------------------------------------------------------------------------------------------------|----|
| 11. Identify the committee(s) approving the study protocol.                                                                                                                                                                                                                                                                                            | NA |
| 12. Include a statement confirming that informed consent was obtained from all subjects and that the experiments conformed to the principles set out in the WMA Declaration of Helsinki and the Department of Health and Human Services Belmont Report.                                                                                                | NA |
| 13. For publication of patient photos, include a statement confirming that consent to publish was obtained.                                                                                                                                                                                                                                            | NA |
| 14. Report any restrictions on the availability (and/or on the use) of human data or samples.                                                                                                                                                                                                                                                          | NA |
| 15. Report the clinical trial registration number (at ClinicalTrials.gov or equivalent), where applicable.                                                                                                                                                                                                                                             | NA |
| 16. For phase II and III randomized controlled trials, please refer to the CONSORT flow diagram ( <a href="#">see link list at top right</a> ) and submit the CONSORT checklist ( <a href="#">see link list at top right</a> ) with your submission. See author guidelines, under 'Reporting Guidelines'. Please confirm you have submitted this list. | NA |
| 17. For tumor marker prognostic studies, we recommend that you follow the REMARK reporting guidelines ( <a href="#">see link list at top right</a> ). See author guidelines, under 'Reporting Guidelines'. Please confirm you have followed these guidelines.                                                                                          | NA |

### F- Data Accessibility

|                                                                                                                                                                                                                                                                                                                                                                                                                                                                                                                                                                                                                                                                                                                                                         |                                                      |
|---------------------------------------------------------------------------------------------------------------------------------------------------------------------------------------------------------------------------------------------------------------------------------------------------------------------------------------------------------------------------------------------------------------------------------------------------------------------------------------------------------------------------------------------------------------------------------------------------------------------------------------------------------------------------------------------------------------------------------------------------------|------------------------------------------------------|
| 18. Provide a "Data Availability" section at the end of the Materials & Methods, listing the accession codes for data generated in this study and deposited in a public database (e.g. RNA-Seq data: Gene Expression Omnibus GSE39462, Proteomics data: PRIDE PXD000208 etc.) Please refer to our author guidelines for 'Data Deposition'.<br><br>Data deposition in a public repository is mandatory for:<br>a. Protein, DNA and RNA sequences<br>b. Macromolecular structures<br>c. Crystallographic data for small molecules<br>d. Functional genomics data<br>e. Proteomics and molecular interactions                                                                                                                                              | All data in this study are provided as EV tables 1-5 |
| 19. Deposition is strongly recommended for any datasets that are central and integral to the study; please consider the journal's data policy. If no structured public repository exists for a given data type, we encourage the provision of datasets in the manuscript as a Supplementary Document (see author guidelines under 'Expanded View' or in unstructured repositories such as Dryad ( <a href="#">see link list at top right</a> ) or Figshare ( <a href="#">see link list at top right</a> ).                                                                                                                                                                                                                                              | All data in this study are provided as EV tables 1-5 |
| 20. Access to human clinical and genomic datasets should be provided with as few restrictions as possible while respecting ethical obligations to the patients and relevant medical and legal issues. If practically possible and compatible with the individual consent agreement used in the study, such data should be deposited in one of the major public access-controlled repositories such as dbGAP ( <a href="#">see link list at top right</a> ) or EGA ( <a href="#">see link list at top right</a> ).                                                                                                                                                                                                                                       | NA                                                   |
| 21. Computational models that are central and integral to a study should be shared without restrictions and provided in a machine-readable form. The relevant accession numbers or links should be provided. When possible, standardized format (SBML, CellML) should be used instead of scripts (e.g. MATLAB). Authors are strongly encouraged to follow the MIRIAM guidelines ( <a href="#">see link list at top right</a> ) and deposit their model in a public database such as Biocompare ( <a href="#">see link list at top right</a> ) or JWS Online ( <a href="#">see link list at top right</a> ). If computer source code is provided with the paper, it should be deposited in a public repository or included in supplementary information. | NA                                                   |

### G- Dual use research of concern

|                                                                                                                                                                                                                                                                                                                                   |    |
|-----------------------------------------------------------------------------------------------------------------------------------------------------------------------------------------------------------------------------------------------------------------------------------------------------------------------------------|----|
| 22. Could your study fall under dual use research restrictions? Please check biosecurity documents ( <a href="#">see link list at top right</a> ) and list of select agents and toxins (APHIS/CDC) ( <a href="#">see link list at top right</a> ). According to our biosecurity guidelines, provide a statement only if it could. | No |
|-----------------------------------------------------------------------------------------------------------------------------------------------------------------------------------------------------------------------------------------------------------------------------------------------------------------------------------|----|
